# Supplementary material for: Chromosome Genome Assembly of Cromileptes altivelis Reveals Loss of Genome Fragment in Cromileptes Compared with Epinephelus Species
Source: MDPI journal article supplement (doi:10.3390/genes12121873), 2021-11-24
Supplement: s1 [file s1]

# Supplementary materials

## Chromosome genome assembly of *Cromileptes altivelis* reveals *Cromileptes* separated from *Epinephelus*

Yang Yang<sup>1</sup>, Lina Wu<sup>1</sup>, Zhuoying Weng<sup>1</sup>, Xi Wu<sup>1</sup>, Xi Wang<sup>1</sup>, Junhong Xia<sup>1,2</sup>, Zining Meng<sup>1,2\*</sup> and Xiaochun Liu<sup>1,2\*</sup>

<sup>1</sup> State Key Laboratory of Biocontrol, Life Sciences School, Sun Yat-sen University, Guangzhou 510275, People's Republic of China

<sup>2</sup> Southern Laboratory of Ocean Science and Engineering, Zhuhai 519000, People's Republic of China

\*Correspondence to Zining Meng, Email: mengzn@mail.sysu.edu.cn and Xiaochun Liu, Email: lsslx@mail.sysu.edu.cn

Yang Yang

yangy595@mail2.sysu.edu.cn

Lina Wu

wuln5@mail2.sysu.edu.cn

Zhuoying Weng

wengzhy5@mail2.sysu.edu.cn

Xi Wu

Wuxi577@126.com

Xi Wang

wangx265@mail2.sysu.edu.cn

Junhong Xia

xiajunh3@mail.sysu.edu.cn

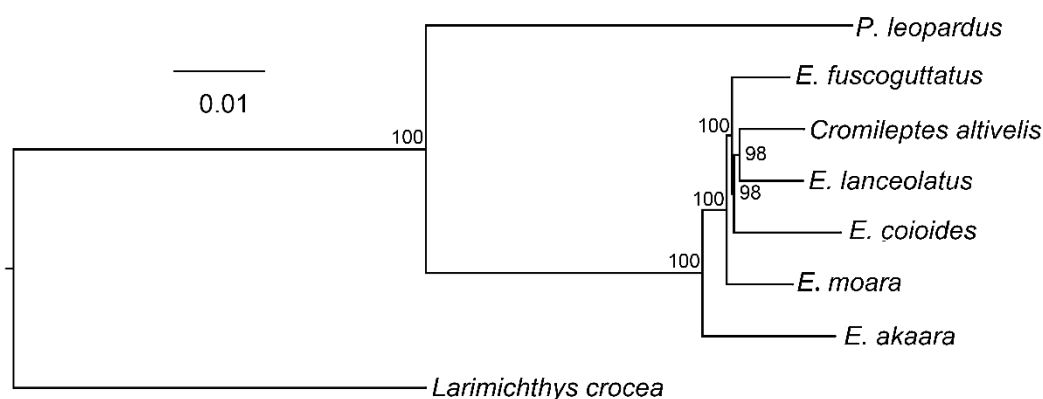

Figure S1 The phylogenetic tree of humpback grouper and other groupers using IQ-tree software.

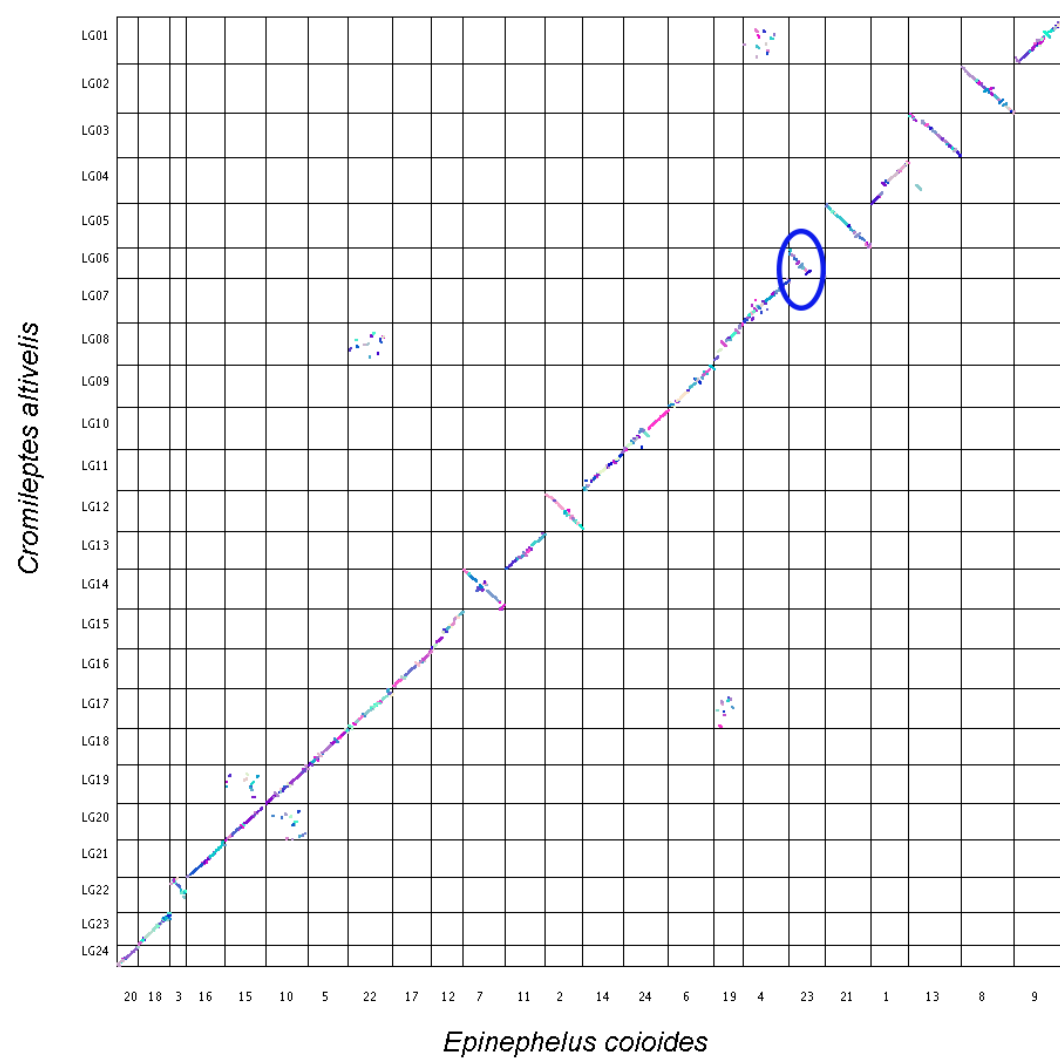

Figure S2 Collinearity analysis of *Cromileptes altivelis* and *Epinephelus coioides*

Table S1 The statistics of repeat information in humpback grouper genome

| Classification    | Type        | Number    | Length(bp)  | Rate (%) |
|-------------------|-------------|-----------|-------------|----------|
| ClassI            | Total       | 972,277   | 233,329,711 | 23.03    |
|                   | DIRS        | 1,540     | 701,333     | 0.07     |
|                   | LARD        | 624,310   | 134,784,136 | 13.3     |
|                   | LINE        | 263,041   | 65,145,254  | 6.43     |
|                   | LTR_Copia   | 4,726     | 607,374     | 0.06     |
|                   | LTR_Gypsy   | 35,183    | 14,599,545  | 1.44     |
|                   | LTR_Unknown | 5,158     | 2,941,409   | 0.29     |
|                   | PLE         | 30,264    | 9,453,329   | 0.93     |
|                   | SINE        | 1,178     | 225,224     | 0.02     |
|                   | TRIM        | 6,707     | 4,819,928   | 0.48     |
|                   | Unknown     | 170       | 52,319      | 0.01     |
| ClassII           | Total       | 462,723   | 111,934,734 | 11.05    |
|                   | Crypton     | 838       | 181,705     | 0.02     |
|                   | Helitron    | 3,867     | 1,275,000   | 0.13     |
|                   | MITE        | 10,701    | 3,107,721   | 0.31     |
|                   | Maverick    | 1,925     | 867,351     | 0.09     |
|                   | TIR         | 432,762   | 104,074,844 | 10.27    |
|                   | Unknown     | 12,630    | 2,428,113   | 0.24     |
| PotentialHostGene | -           | 16,610    | 3,314,773   | 0.33     |
| SSR               | -           | 2,184     | 1,738,061   | 0.17     |
| Unknown           | -           | 164,324   | 30,244,781  | 2.98     |
| Total             | -           | 1,618,118 | 380,561,917 | 37.55    |

Table S2 Gene prediction of humpback grouper

| Method         | Software     | Species                      | Gene number |
|----------------|--------------|------------------------------|-------------|
| Ab initio      | Genscan      | -                            | 31486       |
|                | Augustus     | -                            | 32786       |
|                | GlimmerHMM   | -                            | 97048       |
|                | GeneID       | -                            | 31103       |
|                | SNAP         | -                            | 42652       |
| Homology-based | GeMoMa       | <i>Danio rerio</i>           | 23619       |
|                |              | <i>Salmo salar</i>           | 26880       |
|                |              | <i>Oreochromis niloticus</i> | 24970       |
|                |              | <i>Larimichthys crocea</i>   | 23491       |
|                |              |                              |             |
| RNAseq         | TransDecoder | -                            | 49859       |
|                | GeneMarkS-T  | -                            | 34675       |
|                | PASA         | -                            | 26883       |
| Integration    | EVM          | -                            | 26037       |

Table S3 construction statistics of predicted genes in humpback grouper genome

| Type   | Total number | Total length | Average length | Average number per gene |
|--------|--------------|--------------|----------------|-------------------------|
| Gene   | 26,037       | 443,643,732  | 17,038.97      | -                       |
| Exon   | 252,243      | 72,788,513   | 2,795.58       | 9.69                    |
| CDS    | 245,667      | 44,203,158   | 1,697.71       | 9.44                    |
| Intron | 226,206      | 370,855,219  | 14,243.39      | 8.69                    |
